# Supplementary material
Source: PubMed Central journal article supplement (PMC3150353)

A

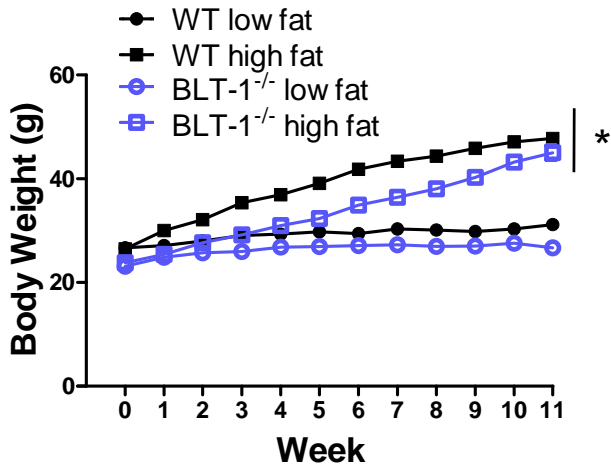

B

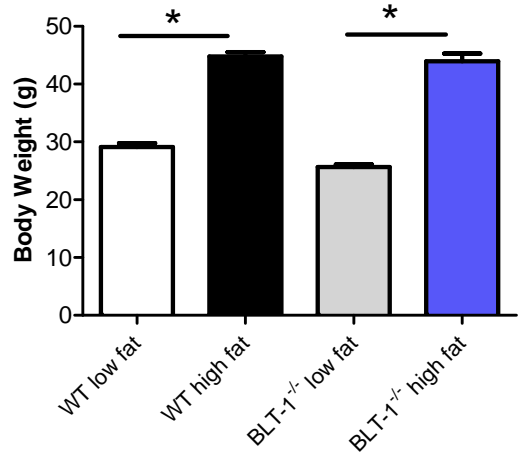

C

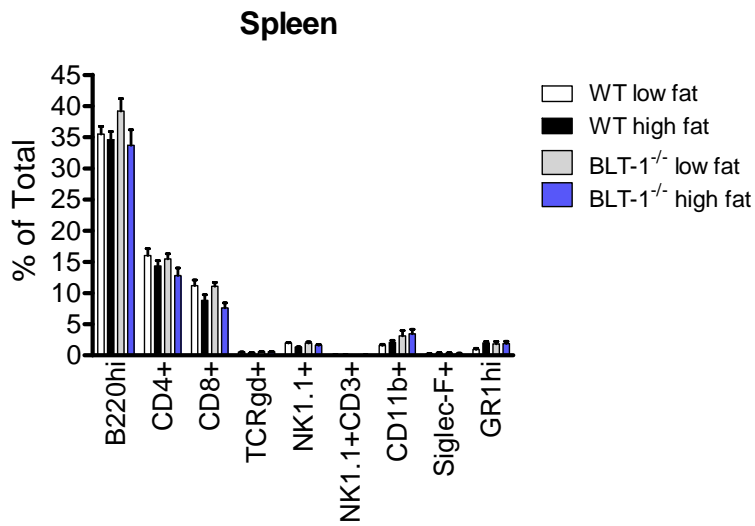

Supplement: NIHMS302927-supplement-2.pdf [file NIHMS302927-supplement-2.pdf]

**A**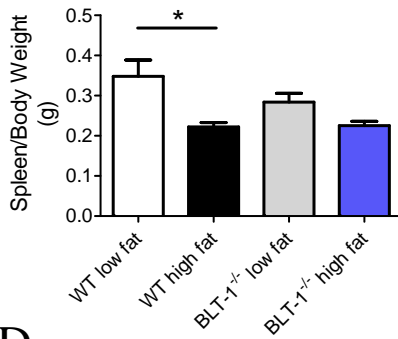**B**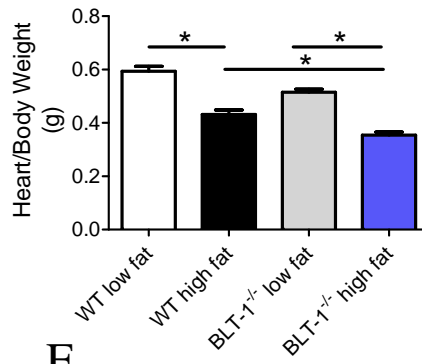**C**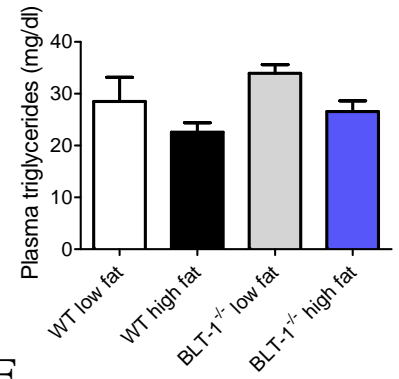**D**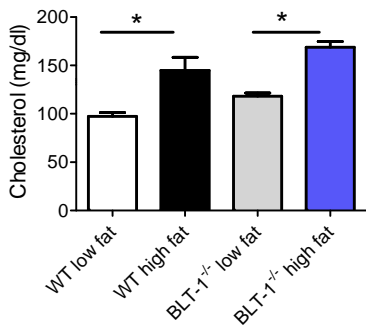**E**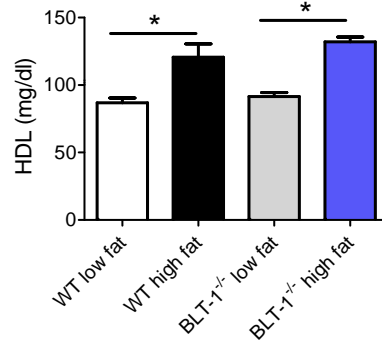**F**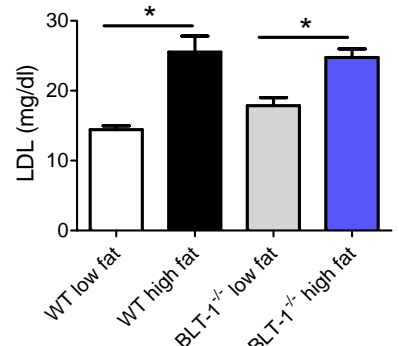**G**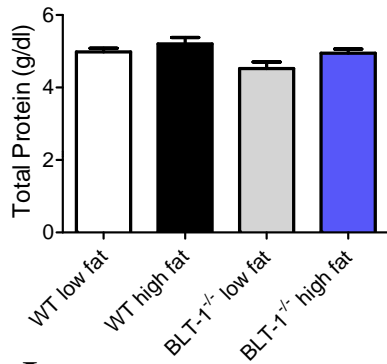**H**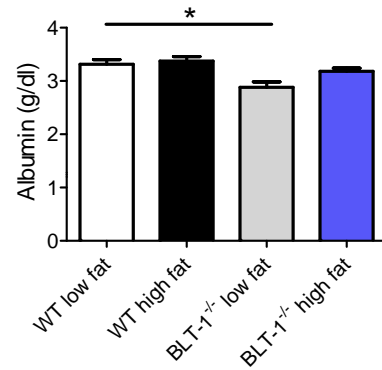**I**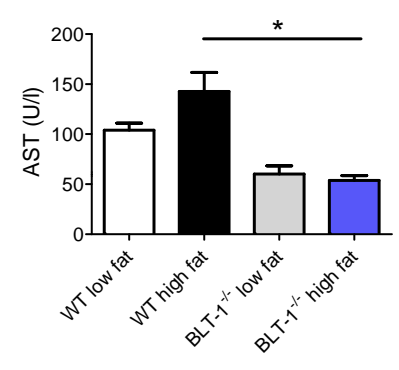**J**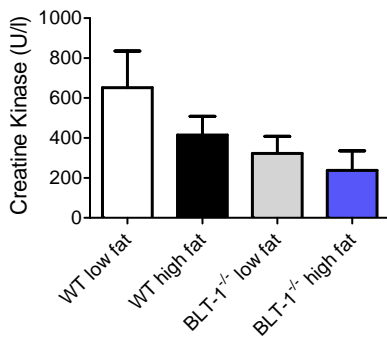**K**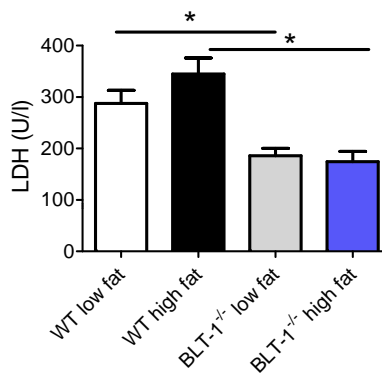**L**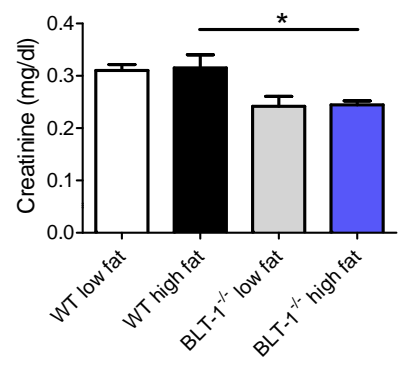

Supplement: NIHMS302927-supplement-3.pdf [file NIHMS302927-supplement-3.pdf]

**A**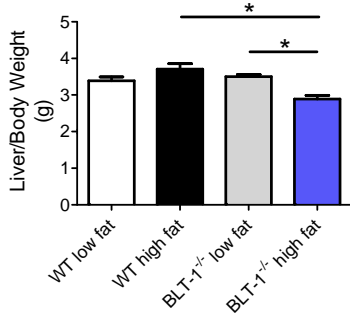**B**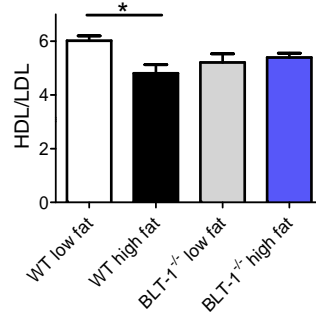**C**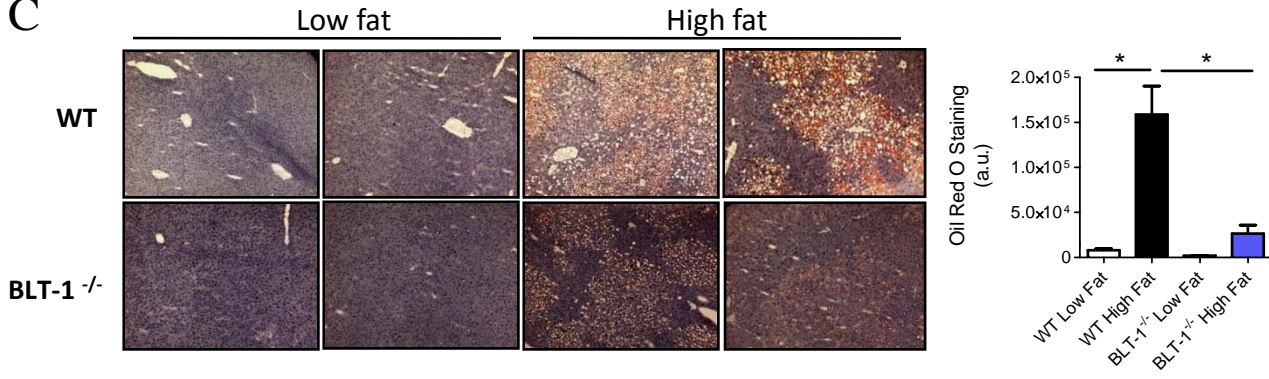**D**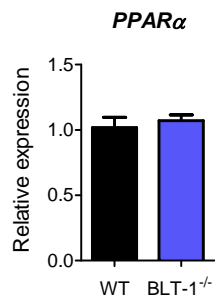

Supplement: NIHMS302927-supplement-4.pdf [file NIHMS302927-supplement-4.pdf]

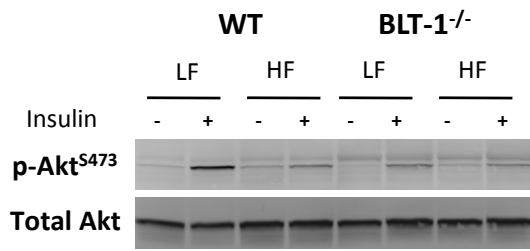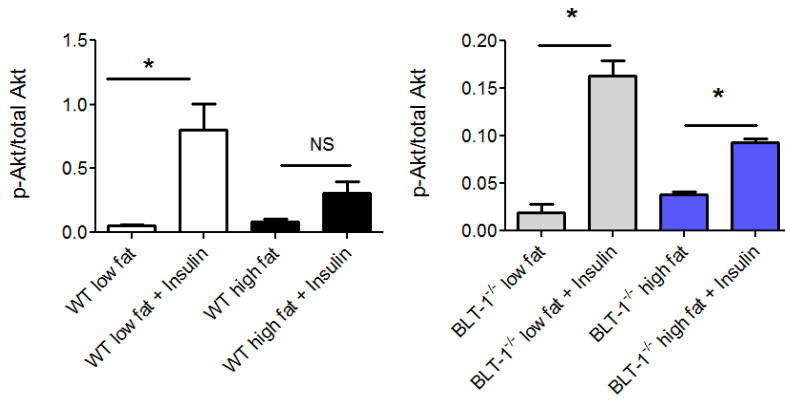

Supplement: NIHMS302927-supplement-5.pdf [file NIHMS302927-supplement-5.pdf]
